# Supplementary material for: Characterization of gene regulation and protein interaction networks for Matrin 3 encoding mutations linked to amyotrophic lateral sclerosis and myopathy
Source: PubMed Central journal article supplement (PMC5840295; doi:10.1038/s41598-018-21371-4), 2018-03-06
Supplement: 41598_2018_21371_MOESM1_ESM.pdf [file 41598_2018_21371_MOESM1_ESM.pdf]

## **Supplementary Information**

### **Characterization of gene regulation and protein interaction networks for Matrin 3 encoding mutations linked to amyotrophic lateral sclerosis and myopathy**

**M. Carolina Gallego Iradi<sup>1\*</sup>, Judy C. Triplett<sup>1\*</sup>, James D. Thomas<sup>2\*</sup>, Rachel Davila<sup>1</sup>, Anthony M. Crown<sup>1</sup>, Hilda Brown<sup>1</sup>, Jada Lewis<sup>1</sup>, Maurice S. Swanson<sup>2</sup>, Guilian Xu<sup>1</sup>, Edgardo Rodriguez-Lebron<sup>3</sup>, David R. Borchelt<sup>1</sup>**

<sup>1</sup>Department of Neuroscience, Center for Translational Research in Neurodegenerative Disease, McKnight Brain Institute, University of Florida, Gainesville, FL

<sup>2</sup>Department of Molecular Genetics & Microbiology, Center for Neurogenetics, McKnight Brain Institute, University of Florida, Gainesville, FL

<sup>3</sup>Department of Pharmacology & Therapeutics, Center for Translational Research in Neurodegenerative Disease, McKnight Brain Institute, University of Florida, Gainesville, FL

\*These authors contributed equally to this report.

Address correspondence to David R. Borchelt, 1275 Center Dr., Box 100159, Gainesville, FL 32610, email: drb1@ufl.edu

**Supplementary Figures S1 – S17**

**Supplementary Tables S2, S3, S4, S6, and S7.**

**Supplementary Tables S1 and S5 are provided as separate Excel Files**

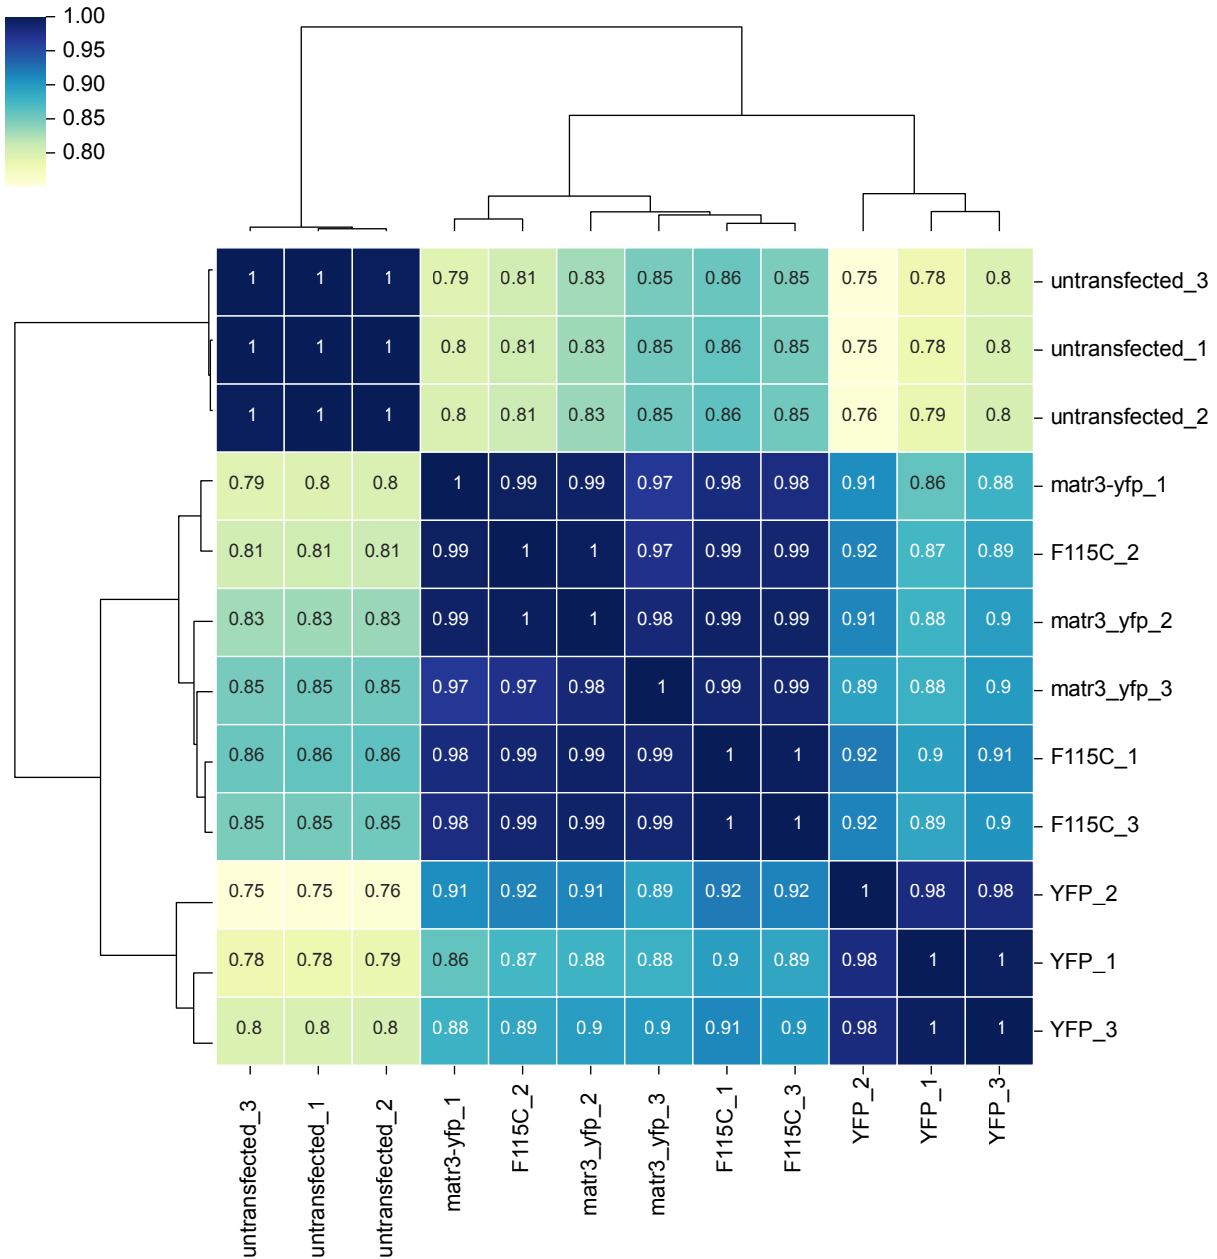

Supplemental Figure S1. Pearson coefficient analysis of RNAseq data.

To assess the variance in RNAseq data from the 3 replicate samples for each condition of transfection, we performed an unsupervised clustering of Pearson correlation values for all pairwise comparisons.

Supplemental Fig. S2

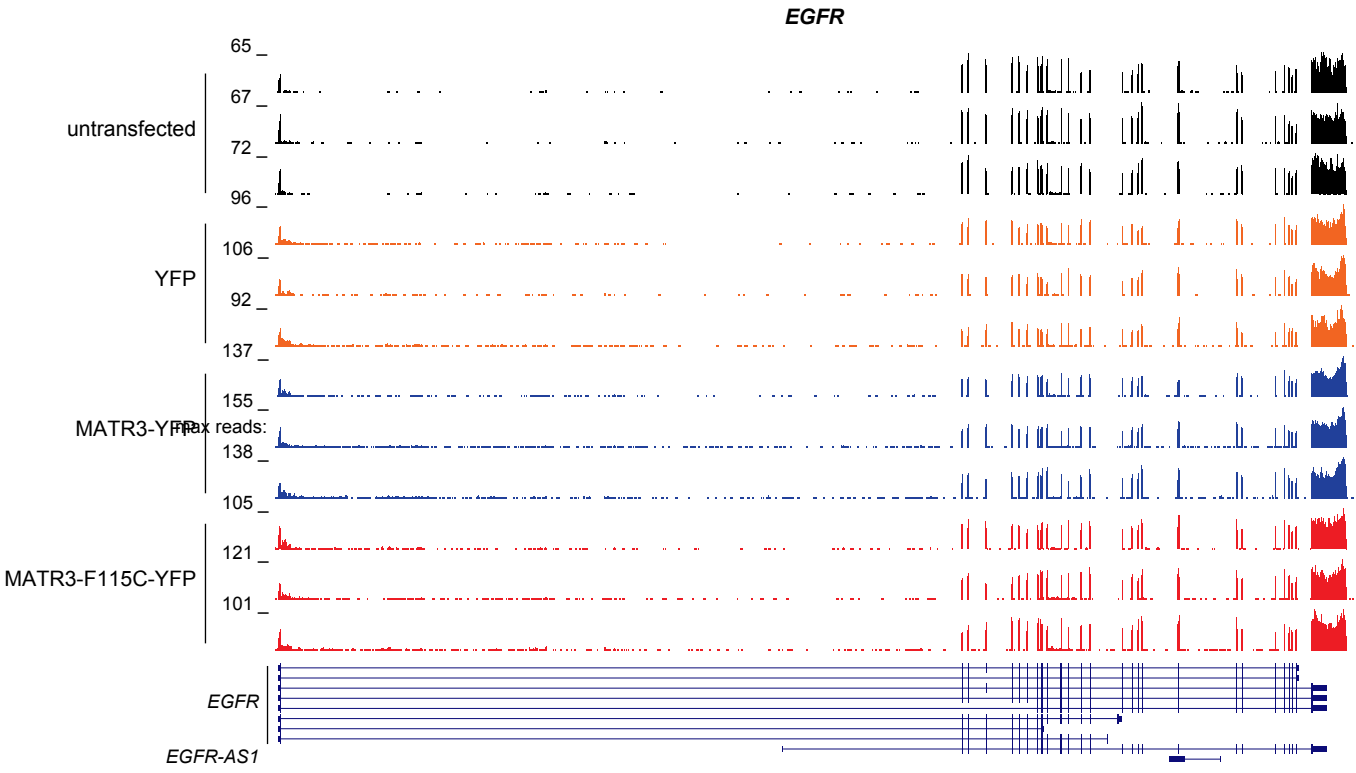

Supplemental Fig. S3

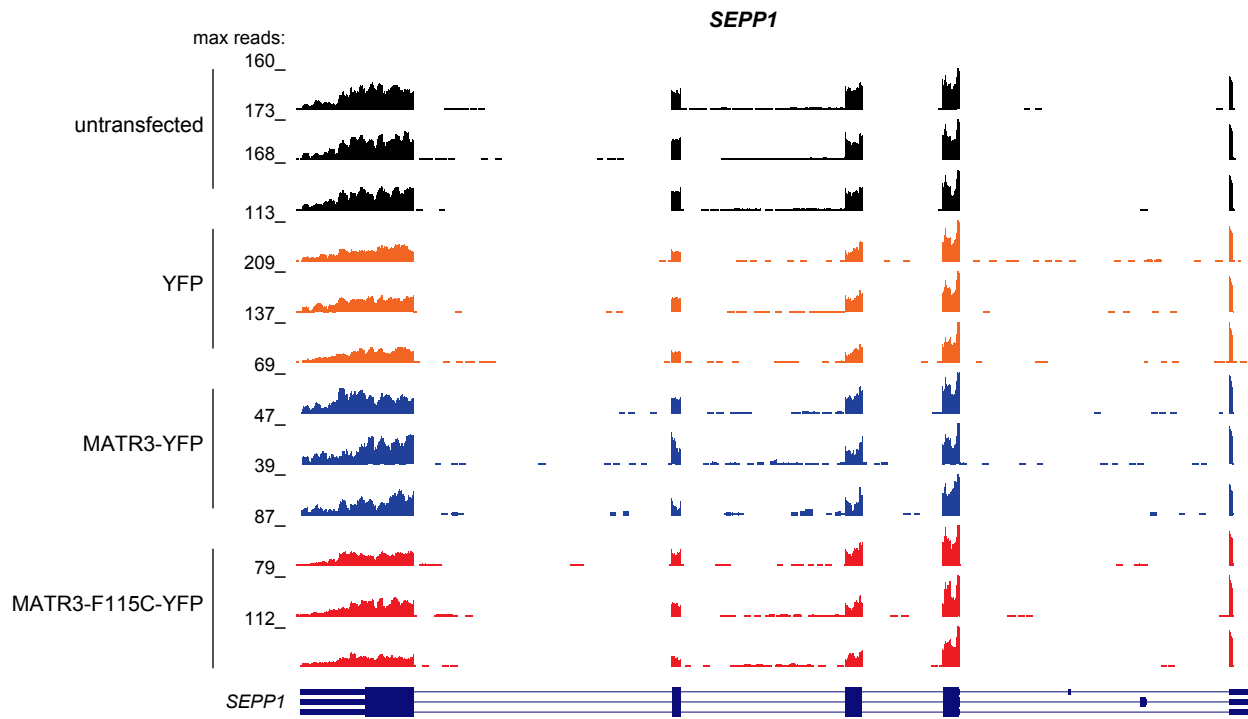



Supplemental Fig. S4

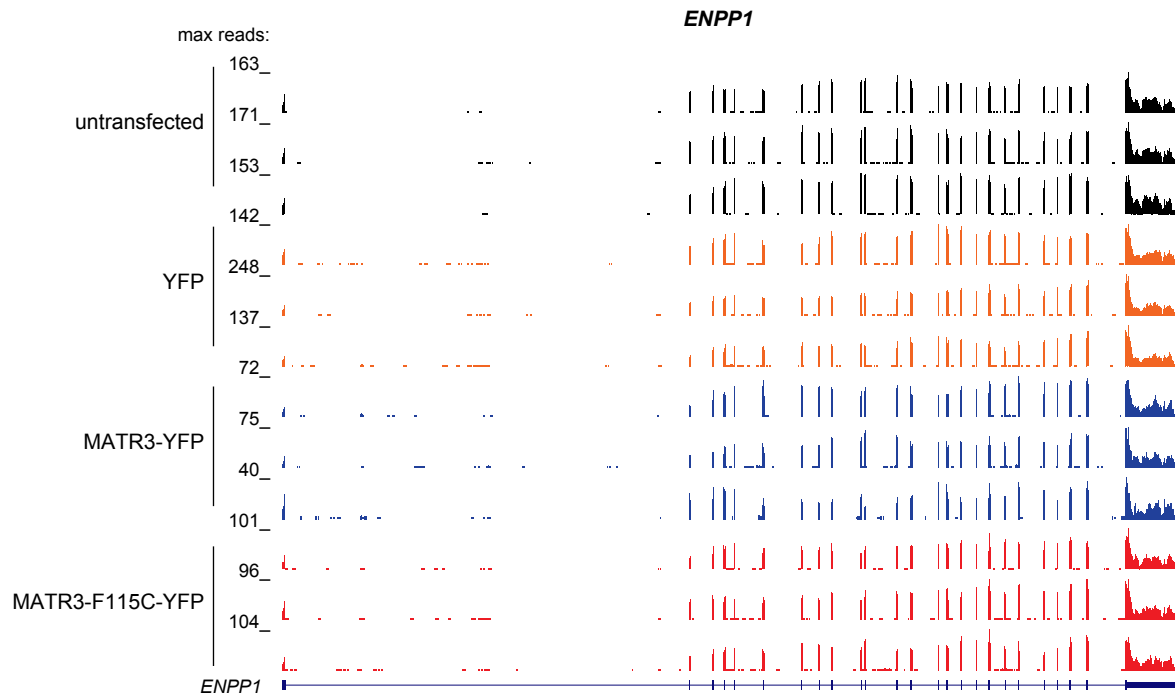

Supplemental Fig. S5

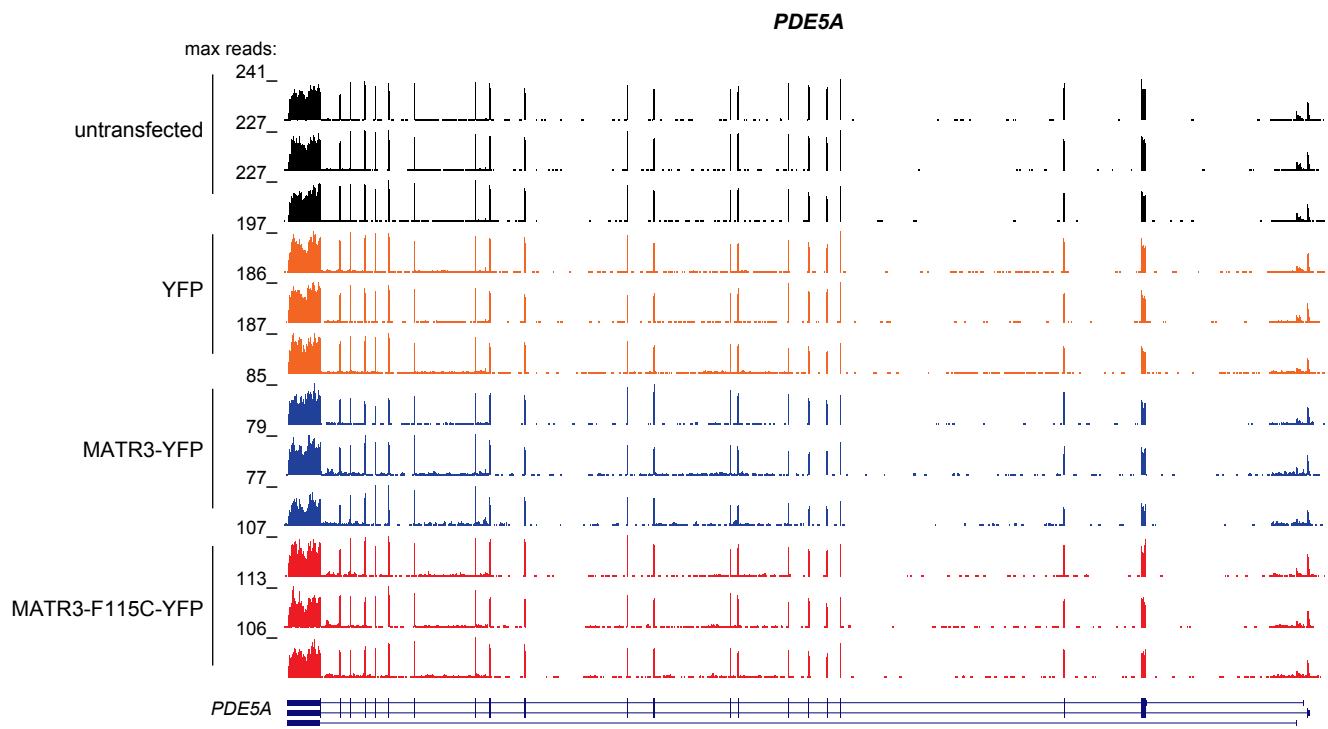

Supplemental Fig. S6

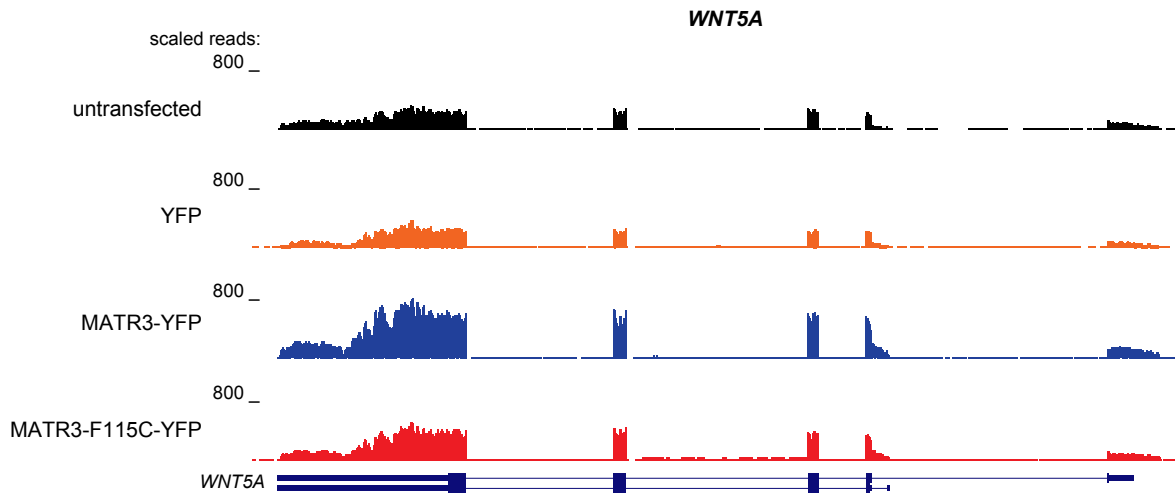

Supplemental Fig. S7

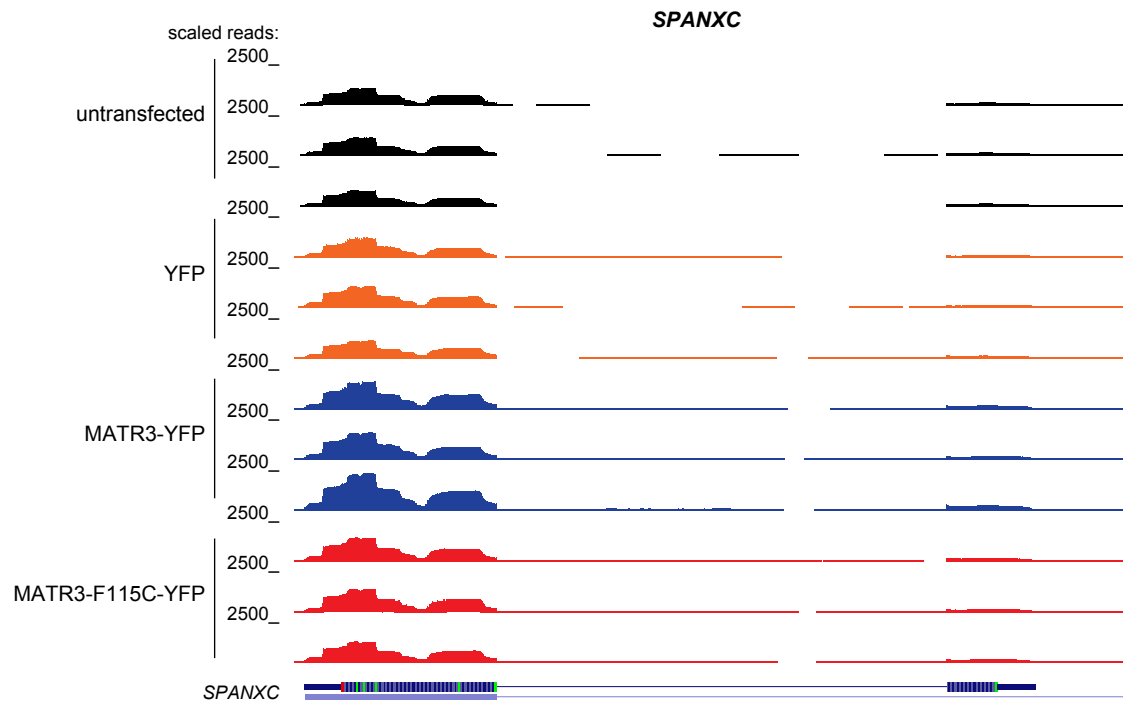

Supplemental Fig. S8

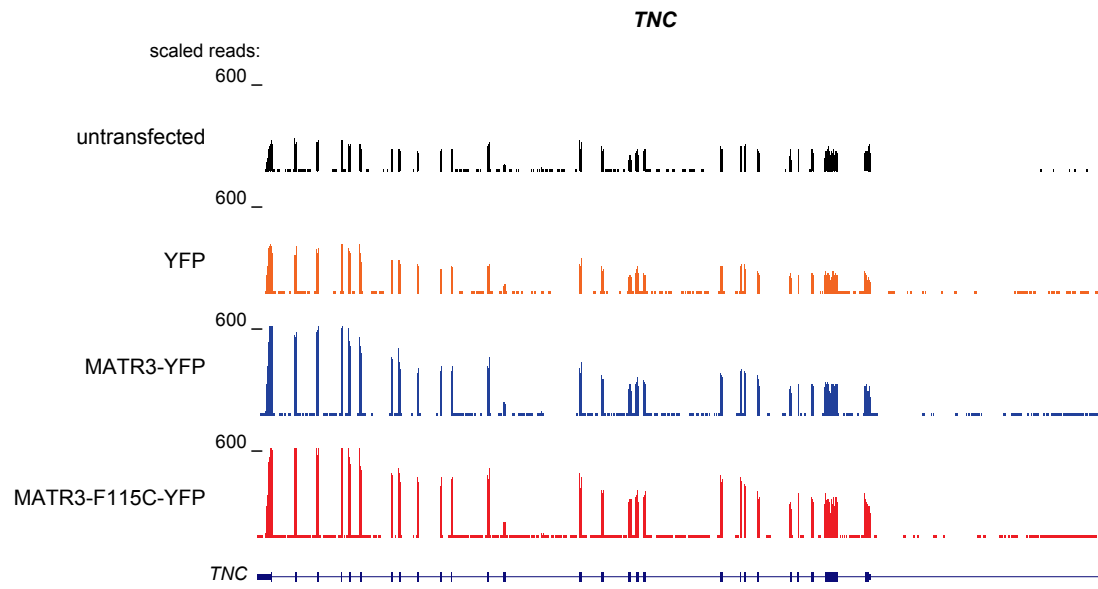

Supplemental Fig. S9

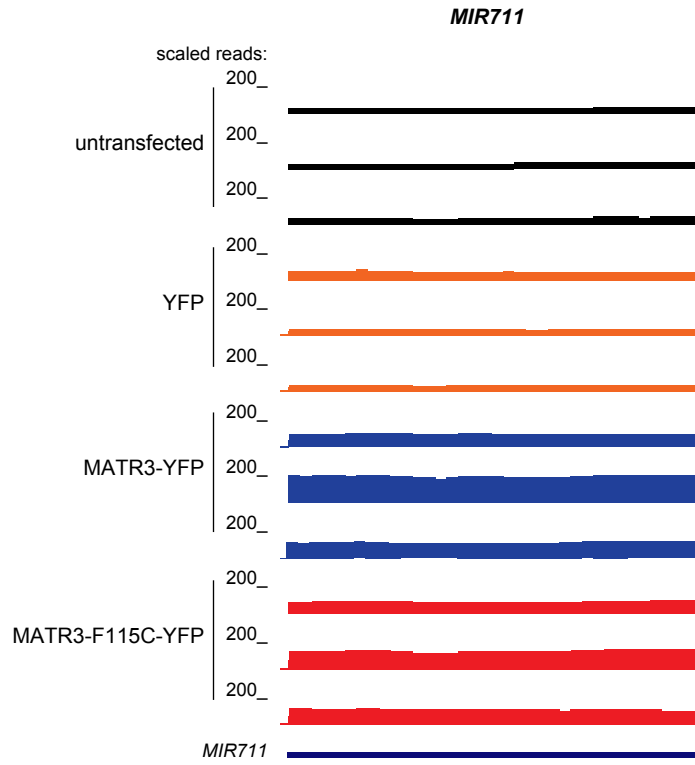

Supplemental Fig. S10

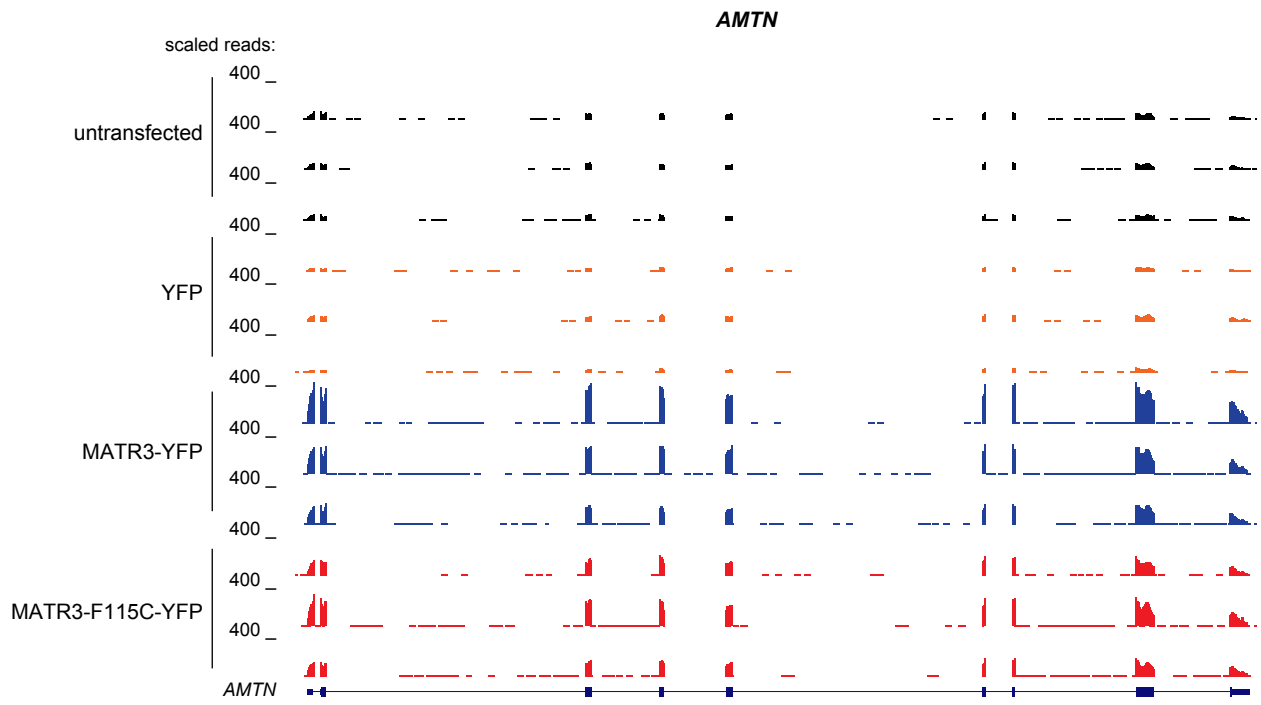

Supplemental Fig. S11

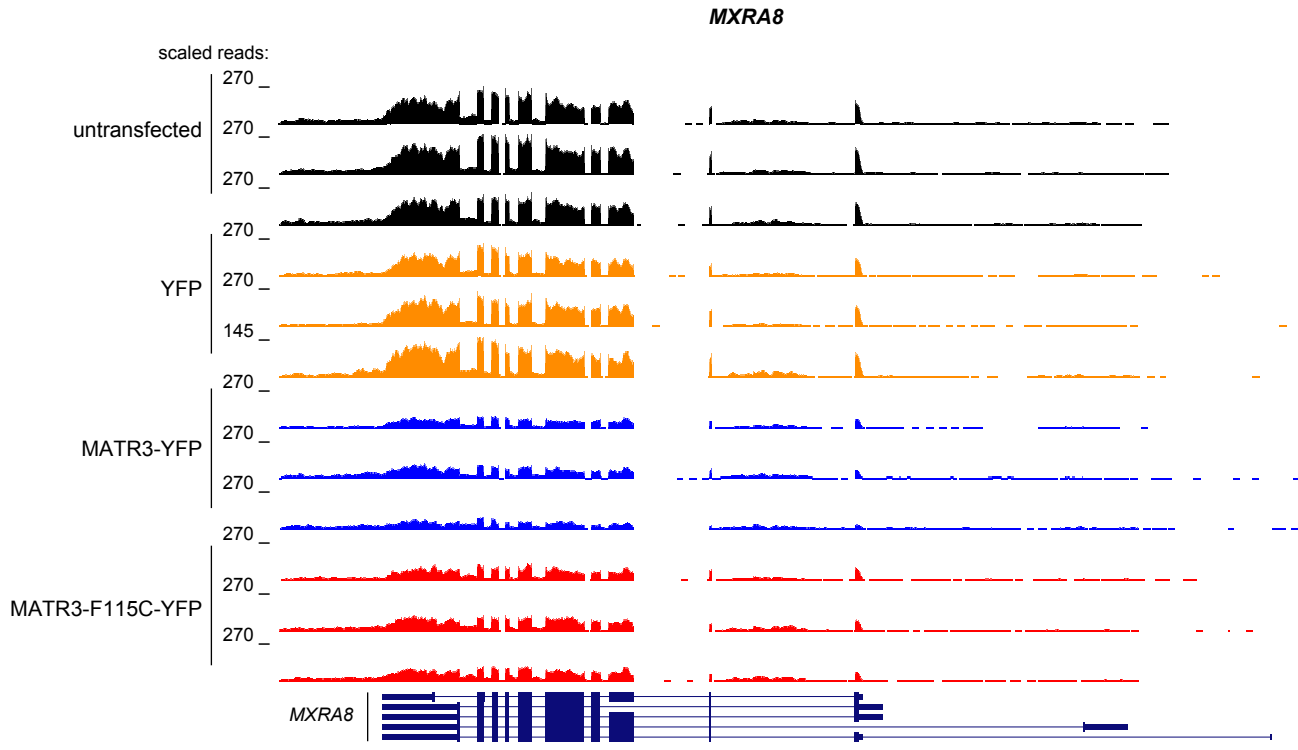



Supplemental Fig. S12

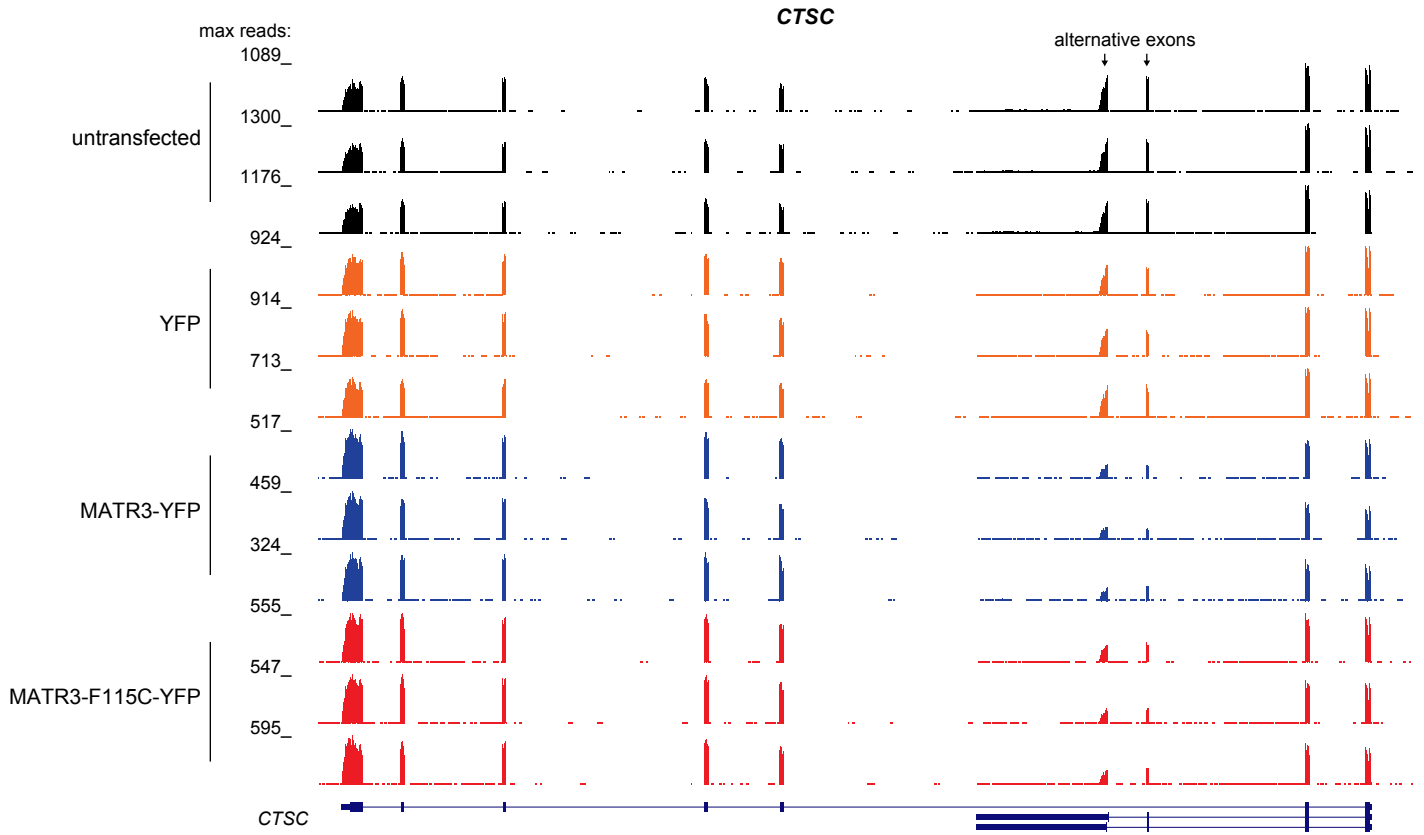

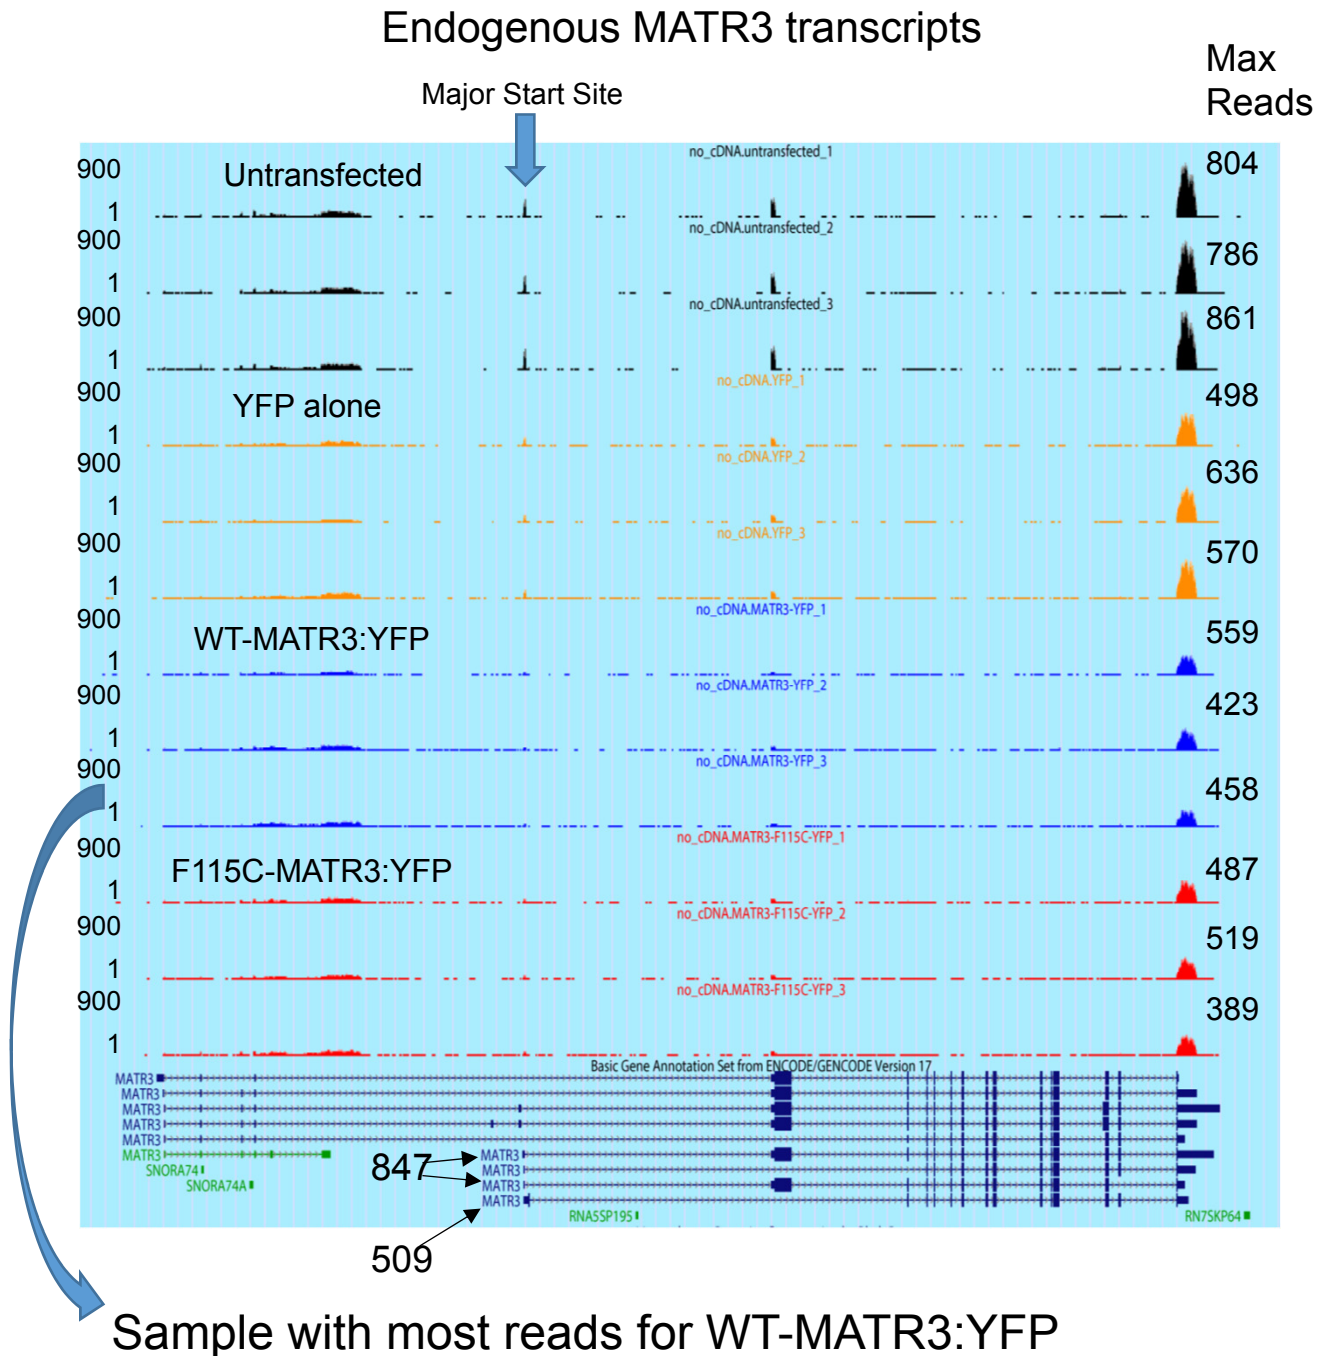

**Supplemental Fig S13.** Image captured from Genome Browser that shows the read mapping with maximum RPKM for endogenous MATR3 after removal of the reads that would map to the coding exons that overlap with the cDNA for MATR3:YFP.

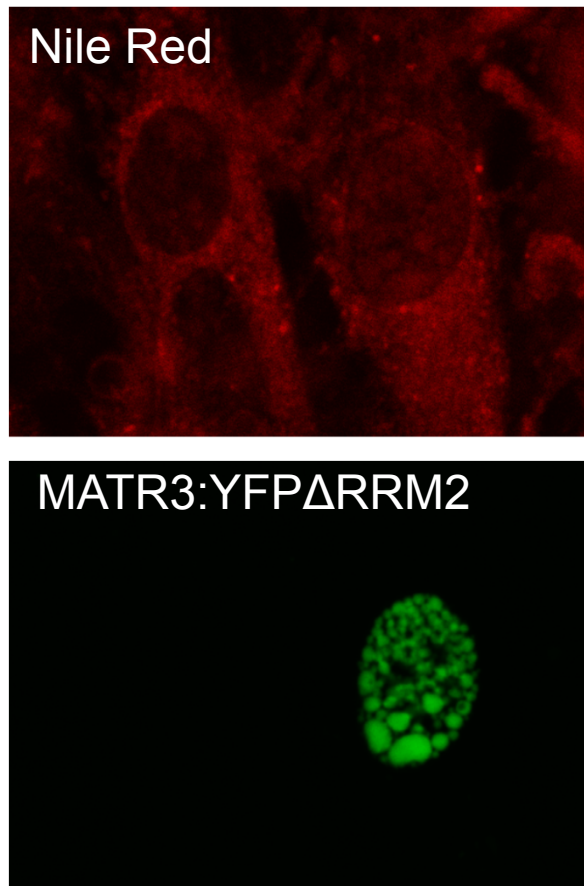

**Supplemental Figure S14. Representative example of cells stained with Nile Red.** C2C12 cells were transiently transfected with expression plasmids for MATR3:YFP $\Delta$ RRM2 and then 24 hours later the cells were fixed in 4% paraformaldehyde for 10 minutes before washing in PBS. The cells were stained with Nile Red prepared by diluting a 1 mg/ml stock solution (in Acetone) 1 to 10,000 in PBS before applying to the cells for 5 minutes. After 2 washes in PBS, the cells were imaged on a Nikon Eclipse Ti-E Inverted Fluorescence microscope image system as described in Methods at 40X magnification. The image shown is representative of what was observed in 2 independent transfection experiments, visualizing 20-50 cells in each experiment.

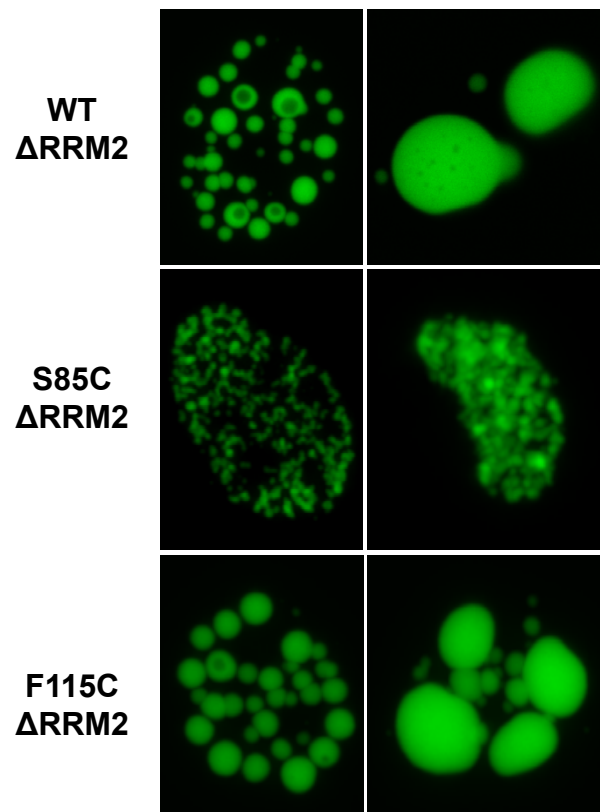

**Supplemental Figure S15. Disease mutations produce different effects on the formation of spheres by MATR3:YFP $\Delta$ RRM2.** Representative images of C2C12 cells expressing WT, S85C, and F115C MATR3:YFP $\Delta$ RRM2. The number of cells analyzed in 3 separate transfection experiments is provided in Table 2. In a single Z-plane, some spheres appear as ring-like structures, or contain a relatively large vacuole. Larger spheres contain small vacuoles, or bubbles. The original magnification of image capture was 60x, with some digital enlargement.

Supplemental Fig. S16

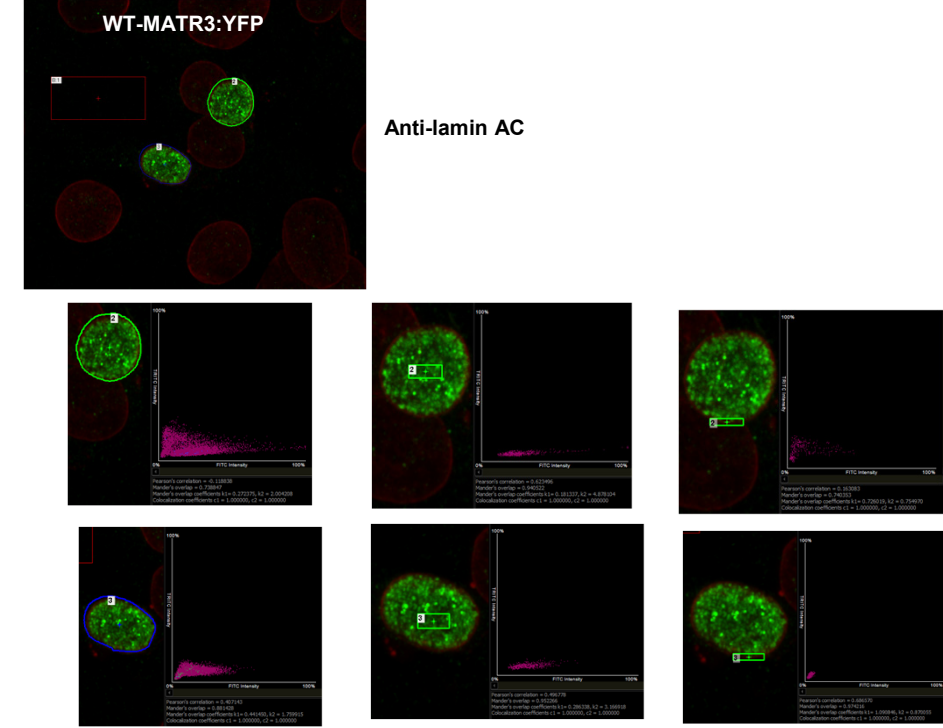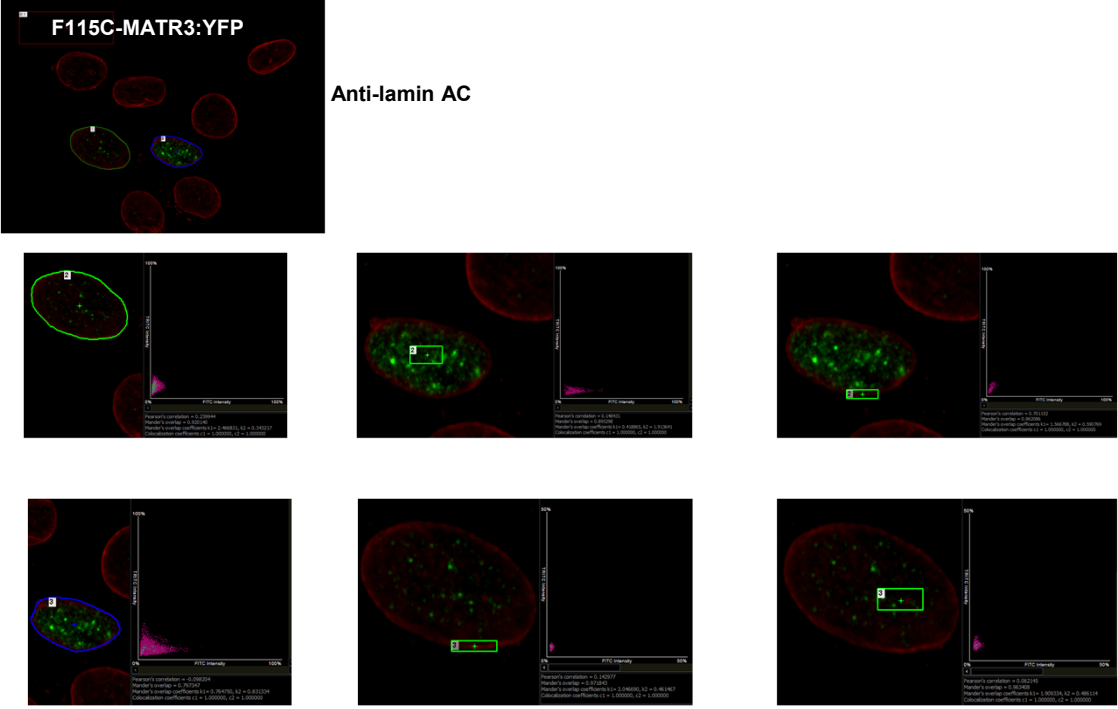

**Supplemental Figure S16. Analysis of MATR3:YFP co-localization with lamin A/C.** Representative images of C2C12 cells expressing WT and F115C MATR3:YFP co-stained with antibodies to lamin AC (red). The degree of fluorescence co-localization in a single Z-plane was assessed using Nikon elements software. The original magnification of image capture was 60x, with some digital enlargement.



| <b>Supplemental Table S2. Genes influenced by over-expression of MATR3:YFP</b>                                                   |                                          |                                       |
|----------------------------------------------------------------------------------------------------------------------------------|------------------------------------------|---------------------------------------|
| Gene Name                                                                                                                        | Log 2 fold change WT<br>MATR3:YFP vs YFP | Fold change F115C MATR3:YFP vs<br>YFP |
| <i>Genes induced by YFP expression with further induction by WT or F115C MATR3 expression (log FC relative to untransfected)</i> |                                          |                                       |
| ORM1                                                                                                                             | 3.50 (6.49)                              | 2.48                                  |
| SERPINB2                                                                                                                         | 3.23 (4.69)                              | 1.70                                  |
| FDCSP                                                                                                                            | 2.87 (7.12)                              | 2.22                                  |
| CSF2                                                                                                                             | 2.59 (11.32)                             | 2.04                                  |
| SPRR2D                                                                                                                           | 2.32 (6.30)                              | 2.05                                  |
| EID3                                                                                                                             | 2.30 (4.09)                              | 1.90                                  |
| OLR1                                                                                                                             | 2.08 (3.93)                              | 1.68                                  |
| SAA1                                                                                                                             | 1.96 (9.40)                              | 1.68                                  |
| TNFAIP6                                                                                                                          | 1.95 (8.59)                              | 1.42                                  |
| TNFAIP2                                                                                                                          | 1.91 (5.13)                              | 1.81                                  |
| C15orf48                                                                                                                         | 1.87 (8.73)                              | 1.16                                  |
| SAA2                                                                                                                             | 1.68 (10.51)                             | 1.56                                  |
| SERPINA1                                                                                                                         | 1.63 (2.79)                              | 1.09                                  |
| CXCL11                                                                                                                           | 1.63 (12.66)                             | 1.20                                  |
| CCL2                                                                                                                             | 1.62 (7.03)                              | 1.40                                  |
| CX3CL1                                                                                                                           | 1.54 (4.63)                              | 1.48                                  |
| SERPINE2                                                                                                                         | 1.54 (2.43)                              | 1.15                                  |
| COL7A1                                                                                                                           | 1.51 (2.03)                              | 1.36                                  |
| SLC2A6                                                                                                                           | 1.45 (3.21)                              | 1.39                                  |
| IL8                                                                                                                              | 1.42 (8.85)                              | 1.13                                  |
| IL32                                                                                                                             | 1.41 (7.27)                              | 1.18                                  |
| IL6                                                                                                                              | 1.28 (10.99)                             | 1.04                                  |
| TNFRSF9                                                                                                                          | 1.26 (6.04)                              | 1.29                                  |
| DNER                                                                                                                             | 1.25 (2.02)                              | 0.90                                  |
| INHBA                                                                                                                            | 1.24 (6.43)                              | 0.84                                  |
| KLHDC7B                                                                                                                          | 1.23 (9.41)                              | 1.23                                  |
| CCL20                                                                                                                            | 1.21 (10.64)                             | 0.98                                  |
| SPANXE                                                                                                                           | 1.16 (2.17)                              | 0.65                                  |
| ELF3                                                                                                                             | 1.16 (1.88)                              | 1.14                                  |
| CXCL3                                                                                                                            | 1.11 (8.99)                              | 1.02                                  |
| EDN1                                                                                                                             | 1.07 (4.02)                              | 0.50                                  |
| C3                                                                                                                               | 1.07 (4.04)                              | 1.18                                  |
| MT1X                                                                                                                             | 1.06 (2.26)                              | 0.60                                  |
| CCL3                                                                                                                             | 1.04 (12.08)                             | N.S.                                  |
| CXCL10                                                                                                                           | 1.03 (11.68)                             | 0.99                                  |
| BIRC3                                                                                                                            | 1.02 (3.65)                              | 0.91                                  |
| CD82                                                                                                                             | 0.99 (3.65)                              | 0.64                                  |
| IL7R                                                                                                                             | 0.98 (1.92)                              | 0.74                                  |
| RAB27B*                                                                                                                          | -0.97 (2.43)                             | -0.83                                 |
| RARRES3*                                                                                                                         | -0.98 (1.90)                             | -0.92                                 |
| HIST1H2BC*                                                                                                                       | -0.99 (1.00)                             | N.S.                                  |
| CTGF*                                                                                                                            | -1.01 (2.87)                             | -0.69                                 |
| CA9*                                                                                                                             | -1.02 (4.65)                             | -0.82                                 |
| TDO2*                                                                                                                            | -1.03 (2.78)                             | N.S.                                  |
| IL1R1*                                                                                                                           | -1.06 (0.81)                             | -0.68                                 |
| VWA5A*                                                                                                                           | -1.08 (2.15)                             | -0.64                                 |
| LOX*                                                                                                                             | -1.08 (1.56)                             | -0.67                                 |
| LGALS9*                                                                                                                          | -1.09 (4.91)                             | -0.97                                 |
| TIMP3*                                                                                                                           | -1.18 (0.45)                             | -0.82                                 |
| A2M*                                                                                                                             | -1.18 (3.11)                             | -0.88                                 |
| TGFA*                                                                                                                            | -1.18 (0.88)                             | -0.93                                 |
| AGT*                                                                                                                             | -1.20 (2.42)                             | -0.96                                 |

|                                                                                                                 |               |       |
|-----------------------------------------------------------------------------------------------------------------|---------------|-------|
| TGM2*                                                                                                           | -1.22 (1.38)  | -1.06 |
| IFNB1*                                                                                                          | -1.30 (9.44)  | -0.91 |
| FOS*                                                                                                            | -1.34 (4.36)  | -0.72 |
| IL18BP*                                                                                                         | -1.40 (2.18)  | -1.30 |
| MGP*                                                                                                            | -1.47 (0.73)  | -1.33 |
| PLAT*                                                                                                           | -1.73(2.5)    | -1.33 |
| CD74*                                                                                                           | -2.33(4.14)   | -2.25 |
| Genes suppressed by YFP expression                                                                              |               |       |
| HBE1                                                                                                            | 1.13 (0.53)   | 0.98  |
| <i>Genes suppressed by WT or F115C MATR3 Overexpression</i>                                                     |               |       |
| Genes induced by YFP expression                                                                                 |               |       |
| TRIB2                                                                                                           | -1.20 (-0.62) | -0.84 |
| Genes suppressed by YFP                                                                                         |               |       |
| UNC13D                                                                                                          | -0.96 (-0.59) | 0.79  |
| CRISPLD1                                                                                                        | -0.96 (-3.38) | -0.45 |
| ARHGAP28                                                                                                        | -0.99 (-2.70) | N.S.  |
| CAT                                                                                                             | -1.00 (-1.55) | -0.72 |
| ENPP2                                                                                                           | -1.03 (-2.16) | N.S.  |
| FLJ22447                                                                                                        | -1.07 (-1.54) | -0.61 |
| COLEC12                                                                                                         | -1.08 (-2.58) | -0.56 |
| EGLN3                                                                                                           | -1.14 (-1.97) | -0.73 |
| RASL11A                                                                                                         | -1.23 (-3.96) | N.S.  |
| PDGFRA                                                                                                          | -1.35 (-1.73) | -0.92 |
| VAV3                                                                                                            | -1.39 (-2.26) | -1.93 |
| PII5                                                                                                            | -1.47 (-4.42) | -0.43 |
| AKAP6                                                                                                           | -1.57 (-2.84) | -0.89 |
| ITGA8                                                                                                           | -1.59 (-2.72) | -0.90 |
| PBX1                                                                                                            | -1.72 (-2.90) | -1.12 |
| CBLN2                                                                                                           | -2.20 (-4.88) | -1.40 |
| *Suppressed by WT and F115C MATR3 relative to YFP expressing cells but induced relative to untransfected cells. |               |       |



| <b>Supplemental Table S3. Non-coding RNA detected in RNA-seq dataset</b> |                             |                                      |
|--------------------------------------------------------------------------|-----------------------------|--------------------------------------|
| <b>Non coding RNAs</b>                                                   | <b>Untransfected vs YFP</b> | <b>Untransfected vs WT MATR3:YFP</b> |
| tRNAs                                                                    | 1                           | 1                                    |
| mt-tRNAs                                                                 | 21                          | 21                                   |
| rRNAs                                                                    | 1                           | 1                                    |
| miRNAs                                                                   | 64                          | 64                                   |
| Piwi RNAs                                                                | 0                           | 0                                    |
| SCARNA                                                                   | 23                          | 23                                   |
| Small nucleolar RNAs (SNORD)                                             | 189                         | 191                                  |
| Small nucleolar RNAs (SNORA)                                             | 76                          | 76                                   |
| Long non coding RNAs                                                     | 105                         | 105                                  |
| Linc RNAs                                                                | 0                           | 0                                    |
| ERV                                                                      | 4                           | 4                                    |
| DNA transposon derived genes transposable                                | 21                          | 21                                   |
| Gag like LTR retrotransposon                                             | 55                          | 55                                   |
| Competing endogenous long non coding RNAs (CERNA)                        | 8                           | 8                                    |
| Transcribed pseudogenes                                                  | 10                          | 10                                   |
| Pseudoautosomal region 1                                                 | 20                          | 20                                   |
| Non coding RNA Ro associated Y                                           | 0                           | 2                                    |
| Non coding RNA 7sl cytoplasmic (RN7SL)                                   | 0                           | 0                                    |
| Small nuclear RNAs non coding                                            | 20                          | 20                                   |
| Cytoplasmic transfer RNAs (TR)                                           | 103                         | 103                                  |
| Mitochondrially encoded tRNAs (MT-T)                                     | 1                           | 1                                    |
| Nuclear encoded mitochondrial tRNAs                                      | 0                           | 0                                    |
| Vault RNAs (VTRNA)                                                       | 6                           | 6                                    |

**Supplemental Table S4. Proteins binding WT MATR3 and MATR3 deletion mutants.**

| Protein<br>(location/pathway)    | MW<br>kDa | RRM                | PrLD | Avg #<br>spectra<br>control | Avg #<br>spectra<br>WT | Fold<br>Change<br>vs<br>Control | p Value   | Ratio<br>ΔRRM1<br>vs WT | Ratio<br>ΔRRM2<br>vs WT | Ratio<br>ΔZnf1<br>vs<br>WT | Ratio<br>ΔZnf2<br>vs<br>WT | SAINT<br>Score | SAINT<br>Fold<br>Change |
|----------------------------------|-----------|--------------------|------|-----------------------------|------------------------|---------------------------------|-----------|-------------------------|-------------------------|----------------------------|----------------------------|----------------|-------------------------|
| MATR3                            | 100       | 2                  | LC   | 5.4                         | 375                    | 69                              | 0.02316   | -                       | -                       | -                          | -                          | -              | -                       |
| <b>HNRNPM<br/>(N,No,I)</b>       | 40        | 2                  | LC   | 4                           | 157                    | 40                              | 0.03967   | 1.22                    | 0.62                    | 1.30                       | 1.76                       | 1              | 39.4                    |
| SFRS14 (N,S)                     | 120       | other <sup>†</sup> | LC   | 1*                          | 26                     | 26                              | 0.00018   | 0.32                    | 0.38                    | 0.32                       | 0.76                       | 1              | 262.5                   |
| <b>PTBP3(N,S,SG)</b>             | 57        | 4                  | -    | 1*                          | 25                     | 25                              | 0.00518   | 0.69                    | 0.51                    | 0.98                       | 0.78                       | 1              | 61.3                    |
| M0QYT0 Unc                       | 36        | 1                  | -    | 1*                          | 24                     | 24                              | 0.00015   | 0.59                    | 0.74                    | 0.45                       | 0.97                       | 1              | 29.7                    |
| <b>ADAR (N,P,SG)</b>             | 138       | other <sup>†</sup> | -    | 1*                          | 23                     | 23                              | 0.01720   | 0.13                    | 0.38                    | 0.05                       | 0.40                       | 1              | 55.6                    |
| PRPF8 (N,No,S)                   | 274       | other <sup>†</sup> | -    | 1                           | 20                     | 20                              | 0.00693   | 0.28                    | 2.60                    | 0.15                       | 1.15                       | 1              | 20.0                    |
| A0A024R8A7<br>Unc                | 62        | other <sup>†</sup> | Y    | 2                           | 39                     | 19                              | 0.0000003 | 0.55                    | 0.52                    | 0.37                       | 0.77                       | 1              | 19.4                    |
| <b>PTBP1 (N,S)</b>               | 59        | 4                  | -    | 2.8                         | 52                     | 19                              | 0.01502   | 0.90                    | 2.32                    | 1.23                       | 1.45                       | 1              | 18.7                    |
| <b>ZNF326 (N,S)</b>              | 66        | -                  | -    | 1*                          | 18                     | 18                              | 0.000011  | 0.38                    | 0.11                    | 0.49                       | 0.38                       | 1              | 182.5                   |
| PABPC1<br>(N,P,SG)               | 71        | 4                  | Y    | 1.4                         | 25                     | 18                              | 0.00599   | 0.58                    | 0.80                    | 0.62                       | 1.32                       | 1              | 17.9                    |
| <b>ILF3 (N,No,I)</b>             | 96        | other <sup>†</sup> | Y    | 1.8                         | 32                     | 18                              | 0.000001  | 0.61                    | 1.03                    | 0.53                       | 1.16                       | 1              | 17.8                    |
| PABPC4 (N,P)                     | 70        | 4                  | Y    | 1*                          | 18                     | 18                              | 0.00002   | 0.48                    | 0.51                    | 0.34                       | 0.90                       | 1              | 44.4                    |
| SNRNP200 (N,S)                   | 245       | other <sup>†</sup> | LC   | 1*                          | 17                     | 17                              | 0.02466   | 0.24                    | 3.15                    | 0.07                       | 1.03                       | 1              | 20.6                    |
| MYBBP1A<br>(N,No,T)              | 149       | -                  | LC   | 1*                          | 16                     | 16                              | 0.00057   | 0.37                    | 3.45                    | 0.52                       | 1.48                       | 1              | 81.3                    |
| B2R959<br><i>HNRNPL sim</i>      | 60        | 3                  | LC   | 2                           | 31                     | 16                              | 0.00026   | 0.61                    | 0.77                    | 0.68                       | 1.03                       | 1              | 15.5                    |
| <b>HNRNPA2B1<br/>(N,P,SG)</b>    | 37        | 2                  | Y    | 5.8                         | 88                     | 15                              | 0.00826   | 0.62                    | 1.79                    | 1.09                       | 0.94                       | 1              | 15.1                    |
| DHX30 (M,R,SG)                   | 134       | other <sup>†</sup> | -    | 1*                          | 15                     | 15                              | 0.01069   | 0.13                    | 0.77                    | 0.20                       | 0.40                       | 1              | 150.0                   |
| IGF2BP3<br>(N,P,SG)              | 64        | 2                  | -    | 1*                          | 15                     | 15                              | 0.00005   | 0.28                    | 1.45                    | 0.17                       | 0.41                       | 1              | 72.5                    |
| BCLAF1 (N,P)                     | 106       | -                  | LC   | 1*                          | 14                     | 14                              | 0.000001  | 1.05                    | 1.93                    | 0.87                       | 1.82                       | 1              | 34.4                    |
| <b>HNRNPA3<br/>(N,S,SG)</b>      | 40        | 2                  | Y    | 2.4                         | 32                     | 13                              | 0.00003   | 0.63                    | 1.41                    | 0.86                       | 1.69                       | 1              | 13.3                    |
| SYNCRIP<br>(N,No,S,SG)           | 70        | 3                  | LC   | 1.2                         | 16                     | 13                              | 0.00022   | 0.22                    | 1.31                    | 0.60                       | 0.63                       | 1              | 13.3                    |
| A0A024RC46<br>Unc                | 34        | 2                  | Y    | 3.6                         | 48                     | 13                              | 0.00114   | 0.48                    | 2.58                    | 0.95                       | 1.47                       | 1              | 13.3                    |
| <b>HNRNPA1<br/>(N,S,SG)</b>      | 34        | 2                  | Y    | 4.4                         | 57                     | 13                              | 0.00191   | 0.57                    | 2.34                    | 1.06                       | 1.57                       | 1              | 13.0                    |
| MOV10 (SG)                       | 114       | other <sup>†</sup> | -    | 1*                          | 13                     | 13                              | 0.01766   | 0.08                    | 0.27                    | 0.14                       | 0.15                       | 1              | 130.0                   |
| ATAD3B (M)                       | 73        | -                  | LC   | 1                           | 13                     | 13                              | 0.01226   | 0.76                    | 0.88                    | 1.49                       | 2.08                       | 1              | 15.6                    |
| <b>HNRNPUL1<br/>(N,S,SG)</b>     | 90        | other <sup>†</sup> | Y    | 1*                          | 13                     | 13                              | 0.00465   | 0.08                    | 0.84                    | 0.10                       | 0.16                       | 1              | 62.5                    |
| THRAP3 (N,S)                     | 109       | other <sup>†</sup> | Y    | 1*                          | 12                     | 12                              | 0.000003  | 0.92                    | 0.92                    | 0.45                       | 1.08                       | 1              | 120.0                   |
| DDX1 (N,No,P,T)                  | 82        | other <sup>†</sup> | -    | 1*                          | 12                     | 12                              | 0.01004   | 0.13                    | 0.04                    | 0.05                       | 0.68                       | 1              | 29.4                    |
| <b>HNRNPR<br/>(N,S,P)</b>        | 71        | 3                  | Y    | 1.6                         | 18                     | 11                              | 0.00006   | 0.27                    | 1.81                    | 0.56                       | 1.10                       | 1              | 11.4                    |
| RPL13A (R,I)                     | 24        | -                  | LC   | 1*                          | 11                     | 11                              | 0.00047   | 0.91                    | 2.41                    | 1.75                       | 2.82                       | 1              | 13.8                    |
| RPL15 (N,No,R)                   | 24        | -                  | LC   | 1*                          | 11                     | 11                              | 0.00014   | 0.57                    | 2.48                    | 0.74                       | 2.00                       | 1              | 52.5                    |
| RPL6 (N,No,R)                    | 33        | -                  | LC   | 2                           | 21                     | 10                              | 0.00043   | 0.48                    | 2.39                    | 1.07                       | 2.12                       | 1              | 10.4                    |
| GTPBP4<br>(N,No,R)               | 74        | -                  | LC   | 1*                          | 10                     | 10                              | 0.00054   | 0.20                    | 1.61                    | 0.06                       | 1.07                       | 1              | 51.3                    |
| <b>HNRNPUL2 (N)</b>              | 85        | -                  | Y    | 1*                          | 10                     | 10                              | 0.00052   | 0.10                    | 0.59                    | 0.12                       | 0.29                       | 1              | 102.5                   |
| RSL1D1<br>(N,No,P,SG)            | 55        | -                  | LC   | 1*                          | 10                     | 10                              | 0.00263   | 0.15                    | 4.40                    | 0.42                       | 2.20                       | 1              | 25.0                    |
| SMC1A<br>(N,No,Ch)               | 143       | -                  | LC   | 1                           | 10                     | 10                              | 0.01218   | 0.30                    | 3.15                    | 0.24                       | 0.50                       | 0.99           | 10.0                    |
| B0AZQ4 (N,Ch)                    | 142       | -                  | LC   | 1*                          | 10                     | 10                              | 0.02789   | 0.15                    | 3.03                    | 0.06                       | 0.21                       | 1              | 48.8                    |
| MYEF2 (N,T)                      | 64        | 3                  | LC   | 1*                          | 10                     | 10                              | 0.00366   | 0.10                    | 0.36                    | 0.31                       | 0.21                       | 1              | 97.5                    |
| SMCHD1<br>(N,No,Ch)              | 226       | -                  | -    | 1*                          | 10                     | 10                              | 0.03239   | 0.15                    | 3.23                    | 0.25                       | 1.85                       | 1              | 24.4                    |
| IGF2BP1<br>(N,P,SG)              | 63        | 2                  | -    | 3.5                         | 33                     | 10                              | 0.000003  | 0.55                    | 1.06                    | 0.49                       | 0.79                       | 1              | 9.7                     |
| EPPK1 (SG)                       | 556       | -                  | -    | 2.2                         | 21                     | 10                              | 0.00753   | 0.56                    | 1.22                    | 0.51                       | 2.26                       | 0.99           | 8.9                     |
| <b>KHDRBS1<br/>(N,No,S,P,SG)</b> | 48        | other <sup>†</sup> | LC   | 1.6                         | 15                     | 9.5                             | 0.00016   | 0.56                    | 0.98                    | 0.71                       | 1.38                       | 1              | 9.5                     |
| DHX15 (N,No,S)                   | 91        | other <sup>†</sup> | LC   | 2                           | 19                     | 9.5                             | 0.000008  | 0.24                    | 1.13                    | 0.32                       | 1.11                       | 1              | 9.5                     |
| B3KY60 (N,T)<br><i>CDC5L sim</i> | 92        | -                  | LC   | 1*                          | 9.5                    | 9.5                             | 0.00718   | 0.42                    | 1.26                    | 0.06                       | 0.21                       | 1              | 11.9                    |
| <b>PRPF6 (N,S)</b>               | 107       | -                  | LC   | 1*                          | 9.5                    | 9.5                             | 0.00914   | 0.11                    | 0.84                    | 0.06                       | 0.63                       | 1              | 47.5                    |
| <b>ILF2 (N,No,I)</b>             | 39        | -                  | LC   | 1.8                         | 17                     | 9                               | 0.00049   | 0.36                    | 1.46                    | 0.64                       | 0.96                       | 1              | 9.3                     |

|                                      |     |                    |    |     |     |     |         |      |      |      |      |      |      |
|--------------------------------------|-----|--------------------|----|-----|-----|-----|---------|------|------|------|------|------|------|
| LRPPRC (N,M,P)                       | 158 | other <sup>†</sup> | -  | 1*  | 9   | 9   | 0.01603 | 0.16 | 1.78 | 0.06 | 0.43 | 1    | 11.6 |
| A8K4T9 (N,S,P)<br><i>RALY sim</i>    | 30  | 1                  | Y  | 1*  | 9   | 9   | 0.00004 | 0.44 | 1.22 | 1.20 | 1.56 | 1    | 9.0  |
| EIF3S8                               | 105 | -                  | LC | 1*  | 9   | 9   | 0.02137 | 0.06 | 0.57 | 0.07 | 0.23 | 1    | 87.5 |
| B2RCM2<br><i>LARS sim</i>            | 134 | -                  | LC | 1*  | 9   | 9   | 0.00893 | 0.06 | 0.46 | 0.41 | 0.46 | 1    | 87.5 |
| RPS9 (N,No,R)                        | 23  | other <sup>†</sup> | LC | 2.2 | 19  | 8.5 | 0.00378 | 0.72 | 0.96 | 1.54 | 1.97 | 1    | 8.5  |
| <b>HNRNPK</b><br><b>(N,T,S,P,SG)</b> | 49  | other <sup>†</sup> | LC | 5.2 | 44  | 8.5 | 0.01622 | 0.75 | 1.72 | 1.00 | 1.08 | 1    | 8.5  |
| Q59GX6<br>helicase                   | 75  | -                  | Y  | 5.6 | 48  | 8.5 | 0.00266 | 0.72 | 1.49 | 0.73 | 1.45 | 1    | 8.5  |
| RPL7A (R)                            | 30  | -                  | LC | 3   | 25  | 8.5 | 0.0004  | 0.77 | 1.37 | 1.52 | 2.30 | 1    | 8.4  |
| RPL28 (R)                            | 16  | -                  | LC | 1.2 | 10  | 8   | 0.0349  | 0.90 | 1.30 | 1.44 | 2.10 | 0.96 | 8.3  |
| <b>RTCB (N,P)</b>                    | 55  | -                  | -  | 1.6 | 13  | 8   | 0.00007 | 0.34 | 1.17 | 0.95 | 1.21 | 1    | 8.3  |
| <b>HNRPH3 (N,S)</b>                  | 37  | 2                  | Y  | 1   | 8   | 8   | 0.00014 | 0.36 | 2.18 | 0.44 | 0.85 | 1    | 8.3  |
| SF3B2 (N,S)                          | 100 | other <sup>†</sup> | LC | 1   | 8   | 8   | 0.01897 | 0.12 | 0.18 | 0.15 | 0.24 | 0.96 | 8.3  |
| <b>RPL7 (R)</b>                      | 30  | -                  | LC | 3.2 | 26  | 8   | 0.00005 | 0.54 | 1.62 | 1.15 | 2.19 | 1    | 8.1  |
| <b>SRSF9 (N,S)</b>                   | 26  | 2                  | -  | 1*  | 8   | 8   | 0.00007 | 0.58 | 1.74 | 1.86 | 2.06 | 1    | 19.4 |
| Q59G75 ( <i>Unc</i> )                | 146 | -                  | -  | 1.2 | 9   | 8   | 0.03206 | 0.22 | 1.03 | 0.32 | 0.86 | 0.98 | 7.7  |
| RPL18 (N,No,R)                       | 22  | -                  | LC | 1.2 | 9   | 8   | 0.00574 | 0.76 | 3.24 | 1.75 | 3.89 | 0.99 | 7.7  |
| RPL4 (N,No,R)                        | 48  | -                  | LC | 4.4 | 34  | 8   | 0.00109 | 0.73 | 1.93 | 0.96 | 2.40 | 1    | 7.7  |
| ATAD3A (M,SG)                        | 66  | -                  | LC | 2.2 | 17  | 8   | 0.00742 | 0.69 | 1.01 | 1.22 | 1.91 | 0.99 | 7.6  |
| A8KAP3<br><i>EFTUD2 sim</i>          | 109 | -                  | LC | 1.8 | 13  | 7   | 0.02806 | 0.15 | 1.89 | 0.14 | 0.75 | 0.97 | 7.4  |
| Q2VIN3<br><i>RBM1 sim</i>            | 41  | 1                  | LC | 3.2 | 23  | 7   | 0.00213 | 1.05 | 0.92 | 1.21 | 1.63 | 1    | 7.1  |
| <b>SAFB (N,T)</b>                    | 103 | 1                  | Y  | 1*  | 7   | 7   | 0.00064 | 0.71 | 0.21 | 0.26 | 0.43 | 1    | 70.0 |
| <b>YBX1 (N,S,SG)</b>                 | 36  | other <sup>†</sup> | LC | 1*  | 7   | 7   | 0.00128 | 0.36 | 1.00 | 0.43 | 0.57 | 1    | 35.0 |
| DDX21<br>(N,No,P,SG)                 | 87  | other <sup>†</sup> | LC | 3.6 | 25  | 7   | 0.00008 | 0.34 | 2.44 | 0.74 | 2.64 | 1    | 6.9  |
| NOP2 (N,No,R)                        | 89  | -                  | LC | 1.6 | 11  | 7   | 0.01063 | 0.32 | 1.55 | 0.44 | 1.73 | 0.99 | 6.9  |
| RPS2 (R)                             | 31  | other <sup>†</sup> | LC | 2.6 | 18  | 7   | 0.00215 | 0.70 | 1.52 | 1.22 | 2.82 | 1    | 6.8  |
| ABCF1                                | 96  | -                  | LC | 1*  | 7   | 7   | 0.02019 | 0.37 | 2.22 | 0.27 | 0.89 | 0.98 | 8.4  |
| EIF4G1 (SG)                          | 172 | -                  | Y  | 1*  | 7   | 7   | 0.02074 | 0.52 | 1.33 | 0.27 | 0.30 | 1    | 33.8 |
| RBM4 (N,No,S,P)                      | 40  | 2                  | -  | 1*  | 7   | 7   | 0.00595 | 0.07 | 0.59 | 0.27 | 0.30 | 1    | 67.5 |
| <b>SRSF7 (N,S)</b>                   | 26  | 1                  | LC | 1*  | 7   | 7   | 0.00995 | 1.26 | 1.70 | 1.16 | 2.22 | 0.99 | 11.3 |
| A8K622<br><i>STAU sim</i>            | 63  | other <sup>†</sup> | -  | 1*  | 7   | 7   | 0.01229 | 0.15 | 0.96 | 0.27 | 0.44 | 1    | 33.8 |
| <b>DDX17</b><br><b>(N,No,S,P)</b>    | 80  | other <sup>†</sup> | Y  | 8.4 | 56  | 9   | 0.00184 | 0.80 | 1.20 | 0.96 | 1.72 | 1    | 6.7  |
| <b>HNRNPA0</b><br><b>(N,No,P,I)</b>  | 31  | 2                  | Y  | 2   | 13  | 7   | 0.00308 | 0.42 | 2.11 | 1.09 | 1.89 | 0.99 | 6.6  |
| ELAVL1<br>(N,No,P,SG)                | 39  | 3                  | -  | 3   | 20  | 6.5 | 0.00593 | 0.79 | 0.95 | 1.20 | 1.54 | 0.99 | 6.5  |
| A8K588 (N,S)<br><i>SFRS6 sim</i>     | 39  | 2                  | LC | 1*  | 6.5 | 6.5 | 0.00324 | 0.85 | 1.46 | 1.29 | 2.15 | 1    | 16.3 |
| <b>HNRNPC</b><br><b>(N,S,P)</b>      | 32  | 1                  | LC | 8   | 51  | 6   | 0.00631 | 0.79 | 1.32 | 0.93 | 1.73 | 0.99 | 6.3  |
| RPS3A (N,No,R)                       | 30  | -                  | -  | 5   | 32  | 6   | 0.00373 | 0.73 | 0.83 | 1.09 | 1.97 | 0.99 | 6.3  |
| <b>RPS13 (N,No,R)</b>                | 17  | -                  | -  | 2.6 | 16  | 6   | 0.00108 | 0.58 | 1.05 | 1.51 | 2.28 | 1    | 6.3  |
| SMC2L1<br>(N,No,C)                   | 136 | -                  | LC | 1.4 | 9   | 6   | 0.02893 | 0.17 | 2.97 | 0.27 | 0.69 | 0.96 | 6.3  |
| SFRS3<br>(N,S,P,SG)                  | 19  | 1                  | LC | 1.2 | 8   | 6   | 0.00368 | 0.93 | 3.07 | 1.52 | 2.27 | 0.99 | 6.3  |
| B4DMY3<br><i>HNRNPAB sim</i>         | 35  | 2                  | Y  | 1*  | 6   | 6   | 0.00007 | 0.48 | 2.80 | 0.77 | 0.80 | 1    | 62.5 |
| TSR1 (N,No,R)                        | 92  | -                  | LC | 1*  | 6   | 6   | 0.00353 | 0.16 | 0.08 | 0.19 | 0.48 | 1    | 62.5 |
| <b>SFPQ (N,S,P,SG)</b>               | 76  | 2                  | Y  | 9.4 | 59  | 6   | 0.00367 | 0.68 | 1.79 | 0.90 | 1.52 | 1    | 6.2  |
| <b>DDX5 (N,No,S)</b>                 | 69  | -                  | Y  | 9.2 | 57  | 6   | 0.00540 | 0.89 | 1.10 | 1.11 | 1.88 | 0.99 | 6.2  |
| <b>RBMX (N,T,I)</b>                  | 42  | 1                  | LC | 5.6 | 34  | 6   | 0.00309 | 1.22 | 1.01 | 1.23 | 1.57 | 1    | 6.2  |
| RPL26L1 (R)                          | 17  | -                  | LC | 1.8 | 11  | 6   | 0.00664 | 0.64 | 1.73 | 1.69 | 2.73 | 0.99 | 6.1  |
| ZC3HAV1<br>(N,SG)                    | 101 | -                  | -  | 1*  | 6   | 6   | 0.01979 | 0.08 | 0.83 | 0.20 | 0.33 | 1    | 60.0 |
| <b>HNRNPU (N,P)</b>                  | 91  | other <sup>†</sup> | Y  | 10  | 60  | 6   | 0.00147 | 0.75 | 1.74 | 1.01 | 1.62 | 1    | 6.0  |
| HNRNPCL1 (N)                         | 32  | 1                  | LC | 3.2 | 19  | 6   | 0.00044 | 0.66 | 1.53 | 0.82 | 1.53 | 1    | 5.9  |
| RPL3 (N,No,R)                        | 46  | -                  | LC | 3   | 18  | 6   | 0.00004 | 0.42 | 2.20 | 0.61 | 1.52 | 1    | 5.9  |
| RPL14 (N,No,R)                       | 24  | -                  | LC | 1.4 | 8   | 6   | 0.00037 | 0.61 | 2.42 | 1.09 | 2.06 | 0.99 | 5.9  |
| RRBP1 (R)                            | 152 | -                  | LC | 1*  | 6   | 6   | 0.01043 | 0.26 | 2.87 | 0.31 | 2.26 | 1    | 57.5 |
| HSPA1B                               | 70  | -                  | -  | 1.4 | 8   | 6   | 0.0201  | 0.52 | 6.58 | 0.31 | 0.77 | 0.95 | 5.5  |
| ZFR (N,No)                           | 117 | -                  | LC | 1*  | 5.5 | 5.5 | 0.00212 | 0.09 | 0.45 | 0.11 | 0.36 | 1    | 55.0 |
| RPS4X (N,No,R)                       | 30  | other <sup>†</sup> | -  | 4.8 | 26  | 5.5 | 0.01078 | 0.76 | 0.70 | 1.55 | 2.44 | 0.99 | 5.5  |
| HCG26523 <i>Unc</i>                  | 17  | -                  | LC | 1.6 | 9   | 5.5 | 0.03222 | 0.74 | 1.49 | 1.85 | 3.54 | 0.97 | 5.5  |

|                              |     |                    |    |     |    |     |          |      |      |      |      |      |      |
|------------------------------|-----|--------------------|----|-----|----|-----|----------|------|------|------|------|------|------|
| SRSF1 (N,S,P)                | 28  | 2                  | LC | 2.2 | 12 | 5   | 0.01679  | 1.49 | 2.30 | 2.55 | 4.51 | 0.97 | 5.3  |
| RPL10A (R)                   | 25  | -                  | -  | 2.6 | 14 | 5   | 0.00387  | 0.51 | 1.42 | 1.00 | 2.18 | 0.99 | 5.3  |
| RPL8 (N,No,R)                | 28  | -                  | -  | 3.4 | 18 | 5   | 0.015837 | 0.68 | 1.32 | 1.62 | 1.97 | 0.95 | 5.2  |
| <b>RBM14 (N,No,T)</b>        | 69  | 2                  | Y  | 5.2 | 27 | 5   | 0.00030  | 0.87 | 1.00 | 0.86 | 1.74 | 1    | 5.1  |
| RPL10 (N,R)                  | 25  | -                  | -  | 2.2 | 11 | 5   | 0.00510  | 0.36 | 2.14 | 1.20 | 2.18 | 0.99 | 5.0  |
| SF3B1 (N,S)                  | 146 | -                  | LC | 2   | 10 | 5   | 0.03394  | 0.15 | 0.45 | 0.30 | 0.20 | 0.96 | 5.0  |
| B3KMC9 Unc                   | 109 | -                  | LC | 1*  | 5  | 5   | 0.00502  | 0.60 | 0.70 | 0.72 | 0.80 | 1    | 50.0 |
| SRPK1 (N,S)                  | 74  | -                  | LC | 1*  | 5  | 5   | 0.04555  | 0.20 | 0.50 | 0.24 | 0.20 | 1    | 50.0 |
| <b>DHX9 (N,No,T)</b>         | 141 | other <sup>†</sup> | Y  | 9.2 | 43 | 4.5 | 0.00022  | 0.55 | 1.95 | 0.65 | 1.27 | 1    | 4.6  |
| EPRS (I)                     | 171 | -                  | -  | 3   | 14 | 5   | 0.01973  | 0.22 | 0.51 | 0.31 | 0.80 | 0.94 | 4.6  |
| RPL13 (N,R)                  | 24  | -                  | LC | 4.4 | 20 | 4.5 | 0.0081   | 0.71 | 1.34 | 1.70 | 2.58 | 0.95 | 4.5  |
| RPS6 (N,No,R)                | 29  | -                  | LC | 3.2 | 14 | 4.5 | 0.0075   | 0.91 | 1.09 | 1.26 | 1.96 | 0.97 | 4.5  |
| HNRPF (N,S,P)                | 46  | 2                  | Y  | 3   | 13 | 4.5 | 0.00155  | 0.62 | 2.69 | 0.92 | 2.38 | 0.99 | 4.3  |
| RPL27 (N,No,R)               | 16  | -                  | LC | 3.4 | 14 | 4   | 0.01033  | 0.69 | 0.84 | 1.53 | 2.55 | 0.94 | 4.0  |
| <b>HNRNPH1 (N,No,S,P)</b>    | 51  | 3                  | Y  | 7   | 28 | 4   | 0.02574  | 0.64 | 2.00 | 1.10 | 2.30 | 0.93 | 3.7  |
| RPS3A (N,No,R)               | 27  | other <sup>†</sup> | -  | 6.6 | 27 | 4   | 0.02574  | 0.89 | 1.08 | 1.15 | 1.55 | 0.99 | 6.3  |
| <b>HNRNPH2 (N,No,S,P,SG)</b> | 49  | 3                  | Y  | 5   | 20 | 4   | 0.00591  | 0.56 | 1.62 | 1.09 | 2.38 | 0.94 | 4.0  |
| RPS11 (N,No,R)               | 18  | -                  | LC | 4.2 | 16 | 4   | 0.01174  | 0.29 | 1.02 | 1.18 | 1.84 | 0.95 | 3.8  |
| FBL (N,No,R,SG)              | 34  | -                  | Y  | 3.6 | 14 | 5   | 0.00560  | 0.30 | 2.22 | 1.11 | 2.89 | 0.93 | 3.8  |
| <b>TARDBP (N,S,P,SG)</b>     | 45  | 2                  | Y  | 1.2 | 4  | 3.5 | 0.00324  | 0.35 | 1.53 | 0.71 | 1.18 | 0.96 | 3.5  |

<sup>†</sup>other: utilizes another RNA binding motif.

PrLD predicted by PLAAC: Prion-like amino acid composition plaac.wi.mit.edu (46); LC- low complexity sequences are present such as Arg/Ser (RS domain), Arg-rich, Gly-rich Glu-rich, or elements >50aa with a low folding index.

\*Peptide counts avg of 0 to 1 rounded to 1.

Bold – match data on MATR3 interactors available in public databases; <https://thebiogrid.org/115126>, <https://www.ebi.ac.uk/intact/>, <http://string-db.org>.

Green highlight – match with (19)

Location and function annotations derived from {uniprot.org}(44, 45), (N = nuclear; No = nucleolar; S = mRNA splicing; P = RNA processing; R = ribosomal; Ch = chromatin; I = inflammation; SG = stress granule).

**Supplemental Table S6. Proteins that show significantly different spectral counts for F115C-MATR3:AviTag capture.**

| Protein (isoform)     | MW kDa | RRM                | PrLD | Avg # spectra control | Avg # spectra WT | Fold Change | p Value vs Control | Avg # spectra F115C | Fold Change vs WT | p Value vs WT | G-Test vs WT | SAINT F115C | SAINT Fold |
|-----------------------|--------|--------------------|------|-----------------------|------------------|-------------|--------------------|---------------------|-------------------|---------------|--------------|-------------|------------|
| MYBBP1A (N,N,T)       | 149    | -                  | -    | 1*                    | 16.25            | 16.25       | 0.0006             | 31.67               | 1.95              | 0.04978       | 0.02780      | 1           | 158.3      |
| MK167 (N,N,C)         | 359    | -                  | LC   | 2.20                  | 15.50            | 7.05        | 0.09146            | 39.33               | 2.54              | 0.04945       | 0.00132      | 1           | 17.9       |
| DDX21 (N,N,T)         | 87     | other <sup>†</sup> | LC   | 3.60                  | 25.00            | 6.94        | 0.00008            | 45.33               | 1.81              | 0.01357       | 0.01608      | 1           | 10.1       |
| RPL5 (N,N,R)          | 34     | -                  | LC   | 1.00                  | 6.25             | 6.25        | 0.10384            | 16.67               | 2.67              | 0.03526       | 0.03406      | 1           | 16.7       |
| RPL32 (R)             | 16     | -                  | LC   | 1*                    | 3.50             | 3.50        | 0.00999            | 13.67               | 3.90              | 0.02761       | 0.01717      | 1           | 34.2       |
| <b>CKAP4</b>          | 66     | -                  | Y    | 3.20                  | 11.00            | 3.44        | 0.08359            | 25.00               | 2.27              | 0.03732       | 0.02155      | 1           | 7.8        |
| Q53HW2 (R)            | 34     | -                  | -    | 1*                    | 3.00             | 3.00        | 0.29235            | 18.00               | 6.00              | 0.04108       | 0.00111      | 1           | 180.0      |
| HMGB2 (N,T,C)         | 24     | -                  | LC   | 1*                    | 2.50             | 2.50        | 0.22817            | 12.67               | 5.07              | 0.02557       | 0.01119      | 1           | 21.1       |
| <b>ALYREF (N,S,P)</b> | 28     | 1                  | LC   | 1*                    | 2.00             | 2.00        | 0.22745            | 10.67               | 5.33              | 0.04306       | 0.01933      | 1           | 13.3       |

<sup>†</sup>other: utilizes another RNA binding motif.

PrLD predicted by PLAAC: Prion-like amino acid composition [plaac.wi.mit.edu](http://plaac.wi.mit.edu) (46); LC- low complexity sequences are present such as Arg/Ser (RS domain), Arg-rich, Gly-rich Glu-rich, or elements >50aa with a low folding index.

\*Peptide counts avg of 0 to 1 rounded to 1.

Bold – match data on MATR3 interactors available in public databases; <https://thebiogrid.org/115126>, <https://www.ebi.ac.uk/intact/>, <http://string-db.org>.

Green – match with (19)

Location and function annotations derived from {[uniport.org](http://uniport.org)} (44, 45), (N = nuclear; No = nucleolar; S = mRNA splicing; P = RNA processing; R = ribosomal; Ch = chromatin; I = inflammation; SG = stress granule).

**Supplemental Table S7. Proteins binding to MATR3ΔRRM2 with >3-fold enrichment relative to WT-MATR3 that are low abundance in control or WT-MATR3 samples.**

| Protein (location)      | MW kDa | RRM                | PrLD | Avg # Spectra Control | Avg # spectra WT | Avg # spectra ΔRRM2 | Fold Change vs WT* | p Value vs WT | G-test Vs Control | SAINT ΔRRM2 | SAINT Fold |
|-------------------------|--------|--------------------|------|-----------------------|------------------|---------------------|--------------------|---------------|-------------------|-------------|------------|
| HSPA5 (Cy)              | 72     | -                  | LC   | 1*                    | 1*               | 35.50               | 35.50              | 0.0000001     | 0.0000001         | 1           | 177.5      |
| EZR (Cy)                | 69     | -                  | LC   | 1.00                  | 1*               | 28.00               | 28.00              | 0.0004464     | 0.0000038         | 1           | 28.0       |
| PNPT1(Cy)               | 86     | other <sup>†</sup> | n    | 1*                    | 1*               | 25.50               | 25.50              | 0.0000001     | 0.0000006         | 1           | 127.5      |
| PA2G4 (Cy)              | 44     | other <sup>†</sup> | n    | 1*                    | 1*               | 23.50               | 23.50              | 0.0004719     | 0.0000002         | 1           | 235.0      |
| B7Z4V2<br>HSPA9 sim (N) | 72     | -                  | LC   | 1*                    | 1*               | 20.00               | 20.00              | 0.0003250     | 0.0000023         | 1           | 33.3       |
| Q59GW1 (N)              | 20     | -                  | LC   | 1*                    | 1.50             | 27.50               | 18.33              | 0.0000058     | 0.0000001         | 1           | 137.5      |
| RDX (Cy)                | 69     | -                  | LC   | 1*                    | 1*               | 17.50               | 17.50              | 0.0045524     | 0.0004229         | 1           | 43.8       |
| MYL6 (Cy)               | 17     | -                  | n    | 1*                    | 1.75             | 30.00               | 17.14              | 0.0010307     | 0.0000002         | 1           | 37.5       |
| MSN (Cy)                | 68     | -                  | LC   | 1*                    | 1*               | 17.00               | 17.00              | 0.0018334     | 0.0005652         | 1           | 28.3       |
| CYFIP1 (Cy)             | 145    | -                  | n    | 1*                    | 1.25             | 19.00               | 15.20              | 0.0001182     | 0.0001758         | 1           | 47.5       |
| RPLP1 (Cy)              | 12     | -                  | n    | 1*                    | 1*               | 15.00               | 15.00              | 0.0000424     | 0.0004304         | 1           | 75.0       |
| NCKAP1 (Cy)             | 130    | -                  | n    | 1*                    | 1*               | 14.50               | 14.50              | 0.0000001     | 0.0000903         | 1           | 145.0      |
| NOLC1 (N,Cy)            | 75     | -                  | LC   | 1*                    | 1*               | 14.50               | 14.50              | 0.0000186     | 0.0000903         | 1           | 36.3       |
| CYFIP2 (N,Cy)           | 143    | -                  | n    | 1*                    | 1.25             | 17.00               | 13.60              | 0.0000066     | 0.0005652         | 1           | 42.5       |
| D3DQY9 (N)              | 22     | -                  | LC   | 1*                    | 1*               | 13.50               | 13.50              | 0.0000001     | 0.0001760         | 1           | 135.0      |
| HEL-S-2a                | 22     | -                  | n    | 1*                    | 1*               | 13.50               | 13.50              | 0.0000014     | 0.0001760         | 1           | 22.5       |
| PSPC1 (N,Cy)            | 59     | 2                  | Y    | 1*                    | 1.25             | 16.50               | 13.20              | 0.0009990     | 0.0066882         | 1           | 20.6       |
| A8K245 (N,Cy)           | 45     | -                  | LC   | 1.00                  | 1*               | 12.50               | 12.50              | 0.0038108     | 0.0440165         | 1           | 12.5       |
| EIF5A (N,Cy)            | 16     | -                  | n    | 1*                    | 1*               | 12.50               | 12.50              | 0.0000393     | 0.0019814         | 1           | 31.3       |
| FEN1 (N)                | 43     | -                  | LC   | 1.00                  | 1.00             | 12.50               | 12.50              | 0.0015825     | 0.0440165         | 1           | 12.5       |
| NME1 (N,Cy)             | 33     | -                  | n    | 1*                    | 1*               | 12.50               | 12.50              | 0.0010837     | 0.0003423         | 1           | 125.0      |
| CBX3 (N)                | 21     | -                  | LC   | 1*                    | 1.00             | 12.00               | 12.00              | 0.0000933     | 0.0004771         | 1           | 120.0      |
| SSBP1 (Cy)              | 17     | -                  | n    | 1*                    | 1*               | 12.00               | 12.00              | 0.0005500     | 0.0251027         | 1           | 20.0       |
| B4DNN4 (N)              | 86     | -                  | LC   | 1*                    | 1*               | 11.50               | 11.50              | 0.0000001     | 0.0006647         | 1           | 115.0      |
| CFL1 (N,Cy)             | 19     | -                  | n    | 1*                    | 1*               | 11.50               | 11.50              | 0.0000459     | 0.0006647         | 1           | 57.5       |
| ALDOA (Cy)              | 40     | -                  | n    | 1*                    | 1*               | 11.00               | 11.00              | 0.0000594     | 0.0161880         | 1           | 13.8       |
| EIF2S2 (Cy)             | 38     | -                  | LC   | 1*                    | 1.50             | 16.50               | 11.00              | 0.0002966     | 0.0000237         | 1           | 165.0      |
| HCFC1 (N,Cy)            | 213    | -                  | n    | 1*                    | 1*               | 11.00               | 11.00              | 0.0034757     | 0.0009255         | 1           | 110.0      |
| HOYHG0 (N)              | 59     | -                  | LC   | 1*                    | 1*               | 10.50               | 10.50              | 0.0000023     | 0.0012881         | 1           | 52.5       |
| MTHFD1L (Cy)            | 99     | -                  | LC   | 1*                    | 1.25             | 13.00               | 10.40              | 0.0007487     | 0.0002455         | 1           | 32.5       |
| <b>ALYREF (N,Cy)</b>    | 28     | 1                  | LC   | 1*                    | 2.00             | 20.50               | 10.25              | 0.0000066     | 0.0002808         | 1           | 25.6       |
| DNM3 (Cy)               | 97     | -                  | n    | 1*                    | 1*               | 10.00               | 10.00              | 0.0025635     | 0.0274882         | 1           | 25.0       |
| FKBP3 (N,Cy)            | 25     | -                  | LC   | 1*                    | 1*               | 9.50                | 9.50               | 0.0016671     | 0.0024909         | 1           | 23.8       |
| KIF4A (N,Cy)            | 128    | -                  | LC   | 1*                    | 1*               | 9.50                | 9.50               | 0.0000718     | 0.0024909         | 1           | 95.0       |
| I6TRR8 (N)              | 109    | -                  | n    | 1*                    | 1*               | 9.00                | 9.00               | 0.0028852     | 0.0158264         | 1           | 45.0       |
| IFIT1 (Cy)              | 52     | LC                 | n    | 1*                    | 1.00             | 9.00                | 9.00               | 0.0000129     | 0.0034605         | 1           | 90.0       |
| LBR (N)                 | 71     | -                  | LC   | 1*                    | 1.75             | 15.50               | 8.86               | 0.0013488     | 0.0108830         | 1           | 19.4       |
| VDAC1 (Cy)              | 31     | -                  | n    | 1.60                  | 1.75             | 15.50               | 8.86               | 0.0003094     | 0.0108830         | 1           | 9.7        |
| FLNC (Cy)               | 287    | -                  | n    | 1*                    | 1*               | 8.50                | 8.50               | 0.0013559     | 0.0048041         | 1           | 85.0       |
| MRE11A (N)              | 81     | -                  | LC   | 1*                    | 1*               | 8.50                | 8.50               | 0.0001230     | 0.0048041         | 1           | 85.0       |
| DKFZp586K0821<br>unc    | 22     | -                  | -    | 1*                    | 1*               | 8.00                | 8.00               | 0.0009005     | 0.0066643         | 1           | 40.0       |
| DYNC1LI1 (Cy)           | 57     | -                  | -    | 1*                    | 1*               | 7.50                | 7.50               | 0.0003758     | 0.0374259         | 1           | 37.5       |
| IMPDH2 (N,Cy)           | 51     | -                  | -    | 1*                    | 1*               | 7.50                | 7.50               | 0.0000010     | 0.0092372         | 1           | 75.0       |
| <b>MAP1B (Cy)</b>       | 271    | -                  | LC   | 1*                    | 1*               | 7.50                | 7.50               | 0.0000125     | 0.0374259         | 1           | 37.5       |
| A0A024RB41<br>(Cy)      | 23     | -                  | LC   | 1*                    | 1*               | 6.50                | 6.50               | 0.0000021     | 0.0176967         | 1           | 65.0       |
| SMARCC2 (N)             | 133    | -                  | Y    | 1*                    | 1*               | 6.50                | 6.50               | 0.0004417     | 0.0176967         | 1           | 65.0       |
| Q69YJ6 unc              | 84     | -                  | LC   | 1*                    | 1*               | 6.00                | 6.00               | 0.0000933     | 0.0244555         | 1           | 60.0       |
| RCN2 (Cy)               | 39     | -                  | LC   | 1*                    | 1.25             | 7.50                | 6.00               | 0.0000010     | 0.0092372         | 1           | 75.0       |
| DDOST (Cy)              | 51     | -                  | n    | 1*                    | 1.75             | 10.00               | 5.71               | 0.0001073     | 0.0274882         | 1           | 16.7       |
| SND1 (N,Cy)             | 102    | -                  | n    | 1*                    | 2.25             | 12.50               | 5.56               | 0.0010837     | 0.0003423         | 1           | 125.0      |
| ENAH (Cy)               | 66     | -                  | LC   | 1*                    | 1*               | 5.50                | 5.50               | 0.0000048     | 0.0337546         | 1           | 60.0       |
| PECI (Cy)               | 40     | -                  | n    | 1*                    | 1*               | 5.50                | 5.50               | 0.0000048     | 0.0337546         | 1           | 55.0       |
| DDX6 (N,Cy)             | 54     | LC                 | Y    | 1*                    | 2.75             | 14.00               | 5.09               | 0.0000767     | 0.0092042         | 1           | 23.3       |
| ACSL3 (Cy)              | 80     | -                  | n    | 1*                    | 2.50             | 12.50               | 5.00               | 0.0016593     | 0.0071805         | 1           | 31.3       |

<sup>†</sup>other: utilizes another RNA binding motif.

PrLD predicted by PLAAC: Prion-like amino acid composition plaac.wi.mit.edu (46); LC- low complexity sequences are present such as Arg/Ser (RS domain), Arg-rich, Gly-rich Glu-rich, or elements >50aa with a low folding index.

\*Peptide counts avg of 0 to 1 rounded to 1.

Bold – match data on MATR3 interactors available in public databases; <https://thebiogrid.org/115126>, <https://www.ebi.ac.uk/intact/>, <http://string-db.org>.

Green – match with (19)

Location annotations derived from {uniprot.org} (N = nuclear; Cy = cytoplasmic).
